# Supplementary material
Source: Springer Nature journal article supplement (https://www.springermedizin.de/resource/supplementary/12871_2014_316_MOESM4_ESM.pdf/9429076)

**A****ProADM**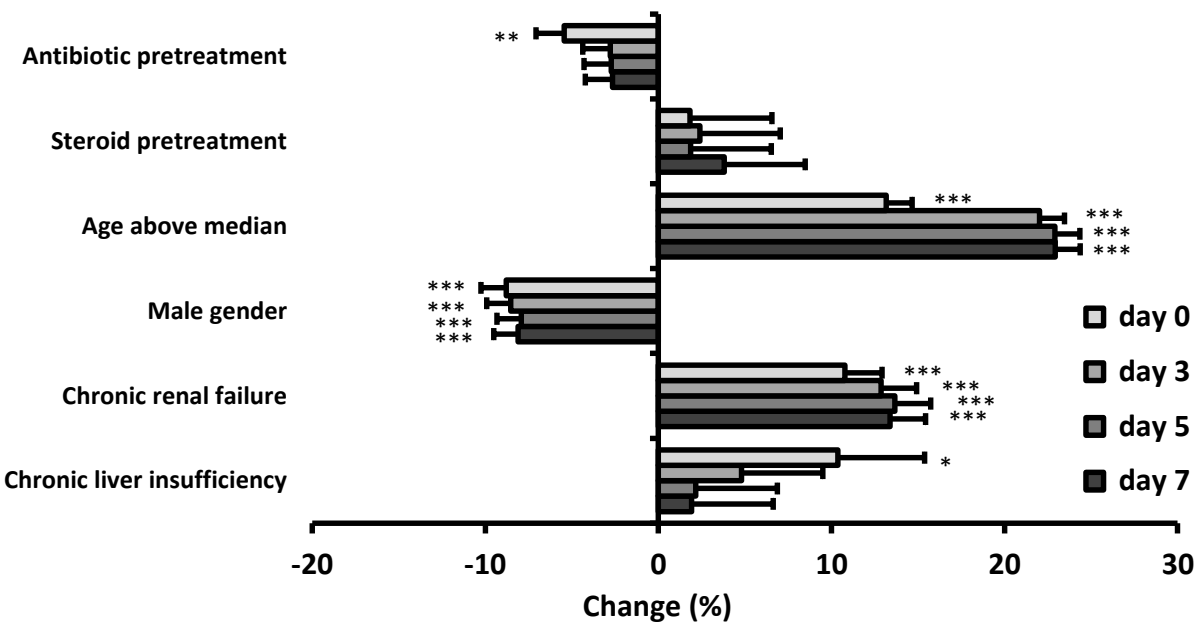**B****Copeptin**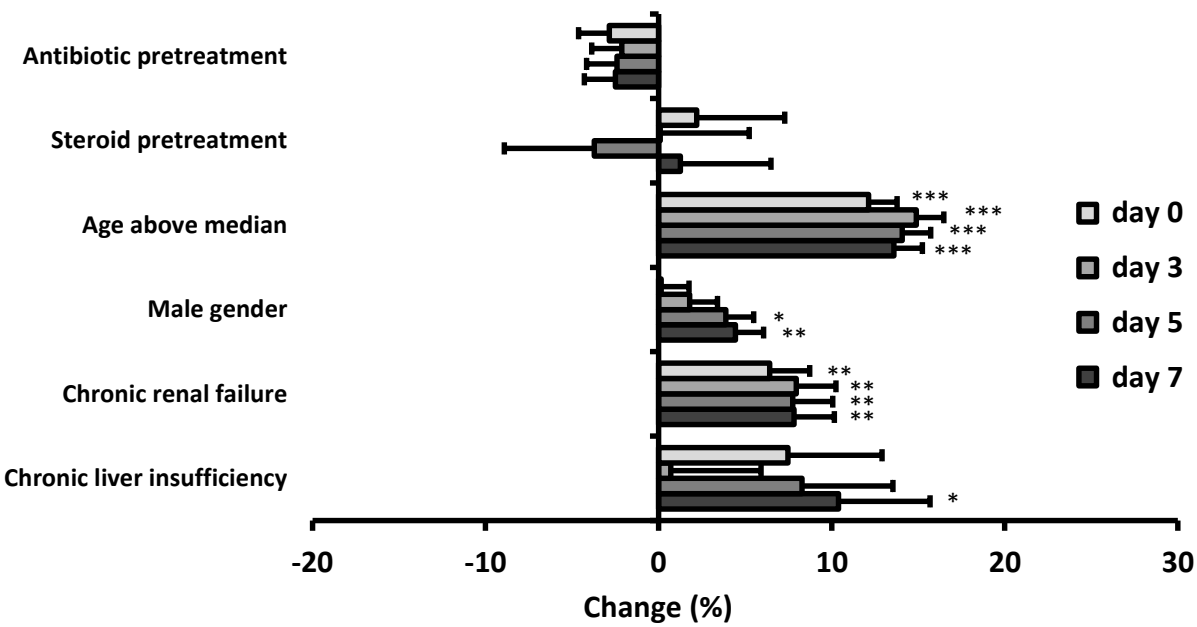

Supplement: MOESM4 [file 9429076]
